# Supplementary material for: Complete Genome Sequence of Borrelia afzelii K78 and Comparative Genome Analysis
Source: PubMed Central journal article supplement (PMC4370689; doi:10.1371/journal.pone.0120548), 2015-03-23

## Legends

### Tracks (top to bottom):

GC%, GC-skew, RNA fwd/RNA rev, CDS fwd/CDS rev, COG assignment, position (bp)

### Plot parameters

GC%, GC-skew: Window size=1000 (plasmids: 400), base step size=20

| Color | Graph   | Description                                     |
|-------|---------|-------------------------------------------------|
|       | GC%     | above mean                                      |
|       | GC%     | below mean                                      |
|       | GC skew | above mean                                      |
|       | GC skew | below mean                                      |
|       | RNA     | tRNA (top: forward, bottom: reverse)            |
|       | RNA     | rRNA (top: forward, bottom: reverse)            |
|       | RNA     | ncRNA, misc_RNA (top: forward, bottom: reverse) |
|       | CDS     | forward                                         |
|       | CDS     | reverse                                         |

| Color | COG | Description                                                   |
|-------|-----|---------------------------------------------------------------|
|       | A   | RNA processing and modification                               |
|       | B   | Chromatin structure and dynamics                              |
|       | C   | Energy production and conversion                              |
|       | D   | Cell division and chromosome partitioning                     |
|       | E   | Amino acid transport and metabolism                           |
|       | F   | Nucleotide transport and metabolism                           |
|       | G   | Carbohydrate transport and metabolism                         |
|       | H   | Coenzyme metabolism                                           |
|       | I   | Lipid metabolism                                              |
|       | J   | Translation, ribosomal structure and biogenesis               |
|       | K   | Transcription                                                 |
|       | L   | DNA replication, recombination, and repair                    |
|       | M   | Cell envelope biogenesis, outer membrane                      |
|       | N   | Cell motility and secretion                                   |
|       | O   | Posttranslational modification, protein turnover, chaperones  |
|       | P   | Inorganic ion transport and metabolism                        |
|       | Q   | Secondary metabolites biosynthesis, transport, and catabolism |
|       | R   | General function prediction only                              |
|       | S   | Function unknown                                              |
|       | T   | Signal transduction mechanisms                                |
|       | U   | Intracellular trafficking and secretion                       |
|       | V   | Defense mechanisms                                            |
|       | W   | Extracellular structures                                      |
|       | Y   | Nuclear structure                                             |
|       | Z   | Cytoskeleton                                                  |

# A - Chromosome [*Borrelia afzelii* K78] 905949 bp

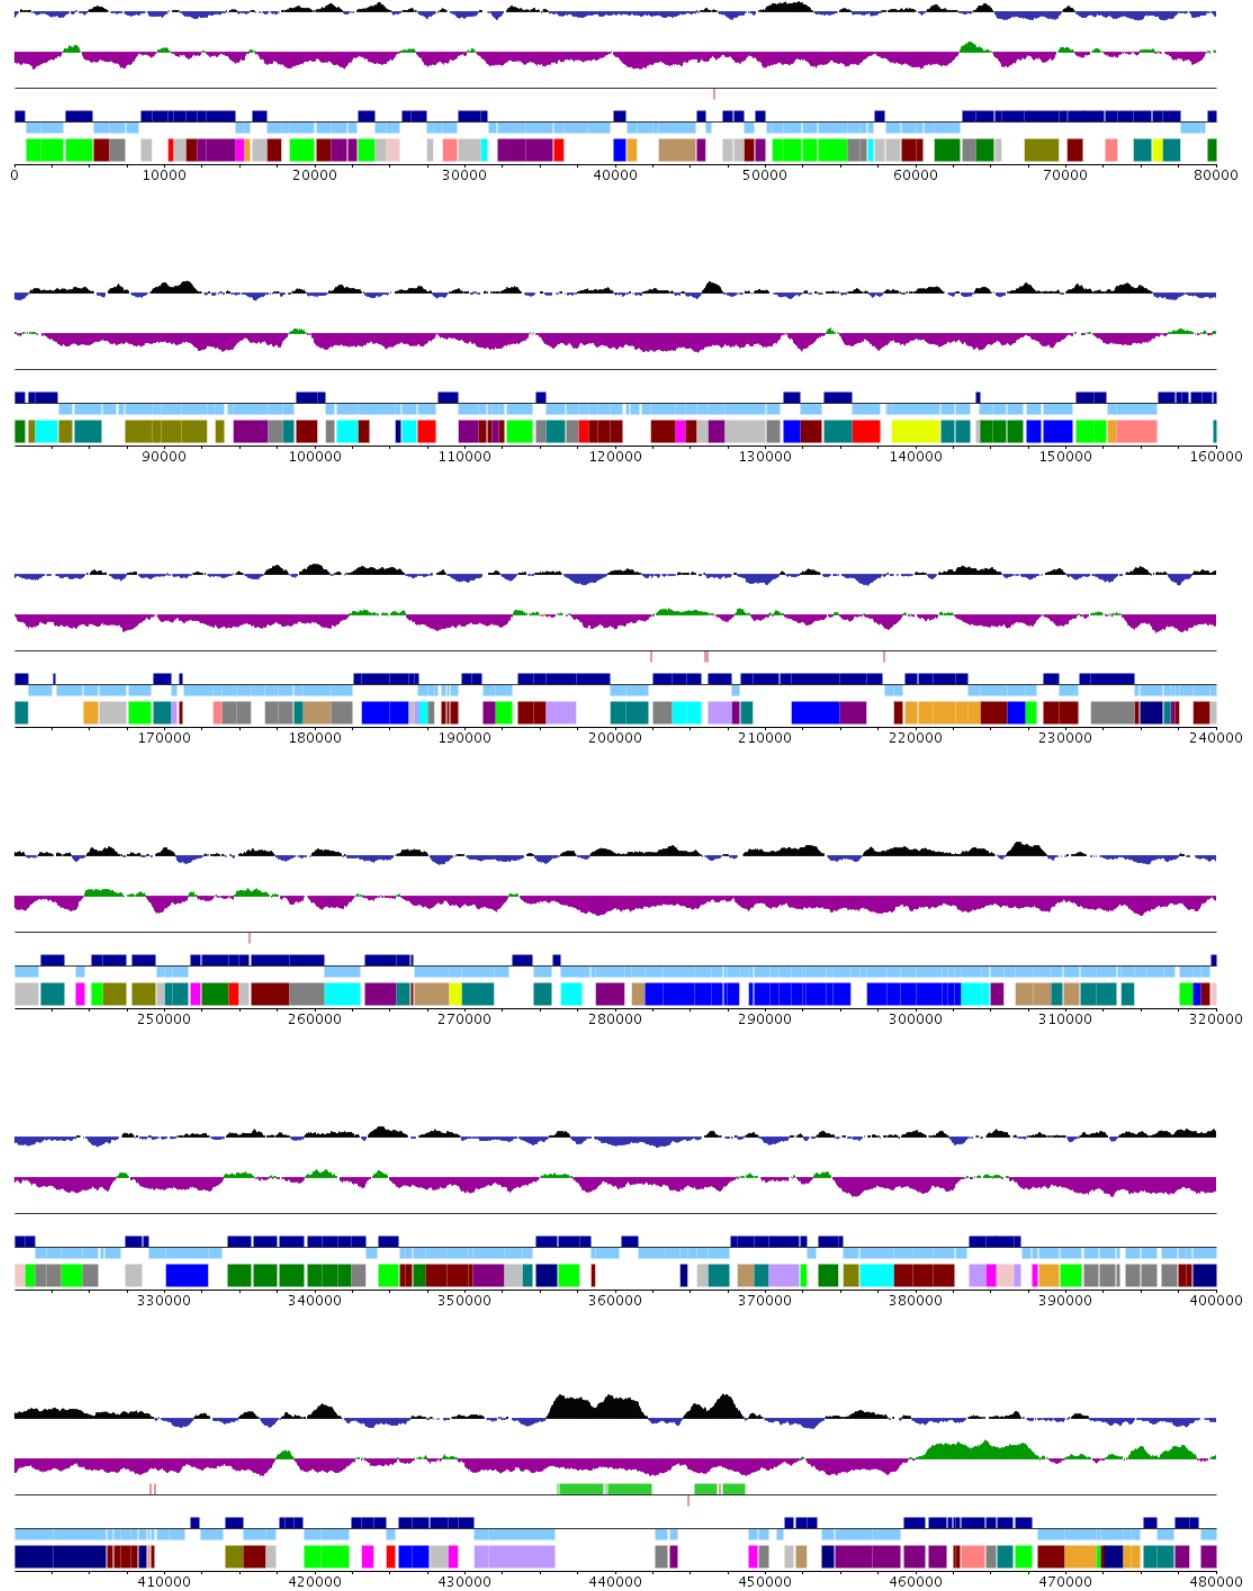

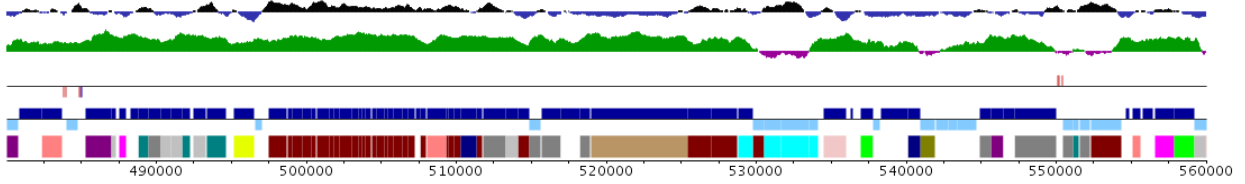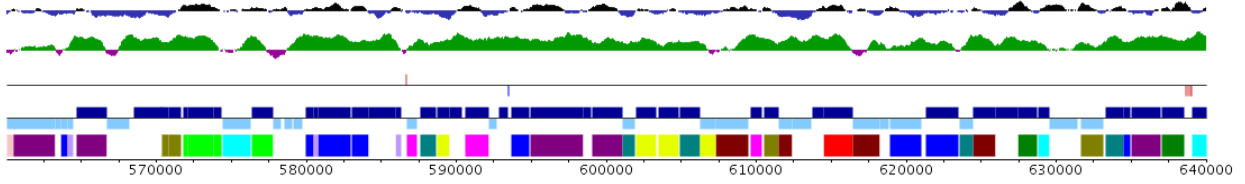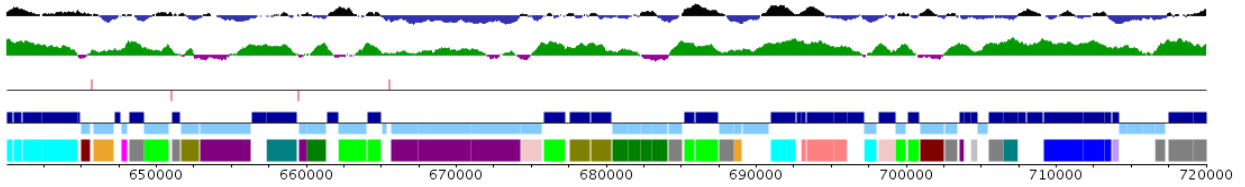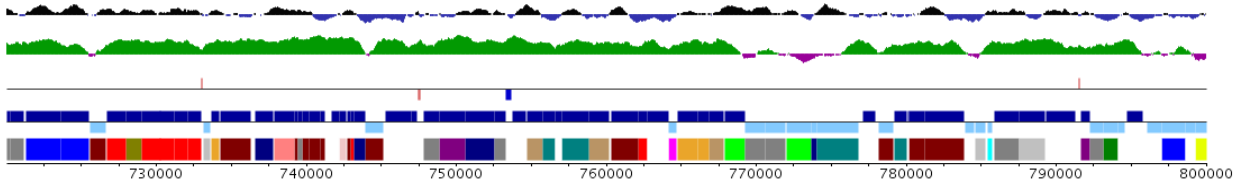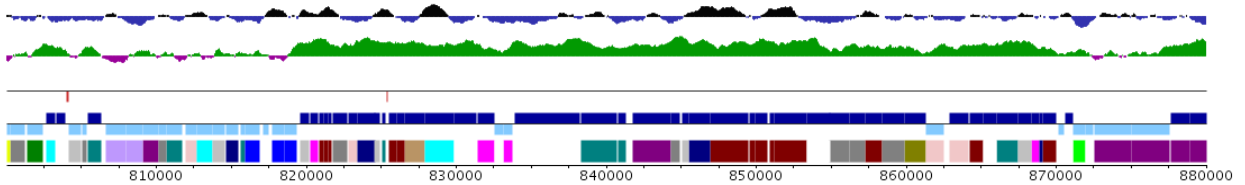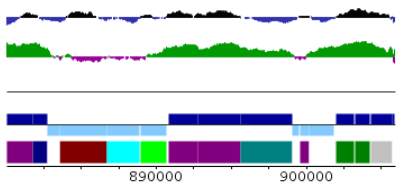

**B - Plasmid Ip17 "D" 25221 bp**

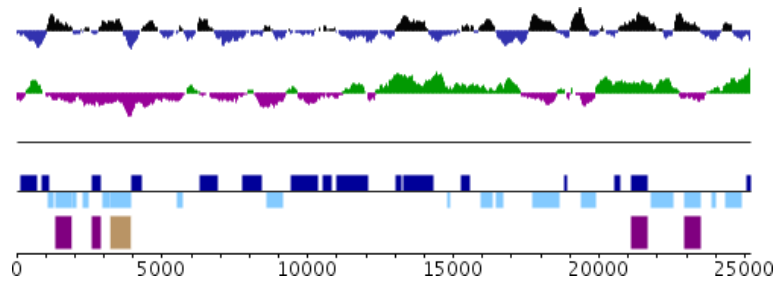

**C - Plasmid Ip28-1 "F" 28272 bp**

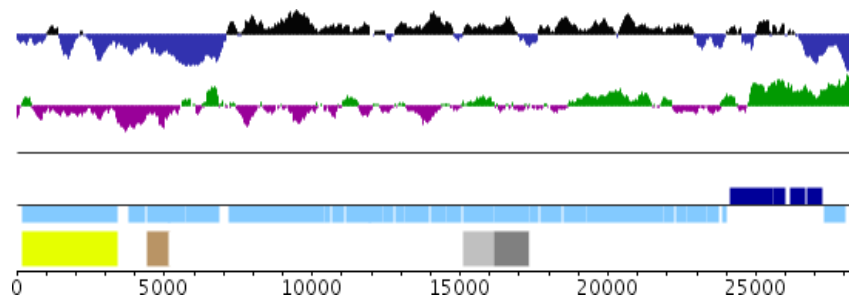

**D - Plasmid Ip28-2 "G" 28738 bp**

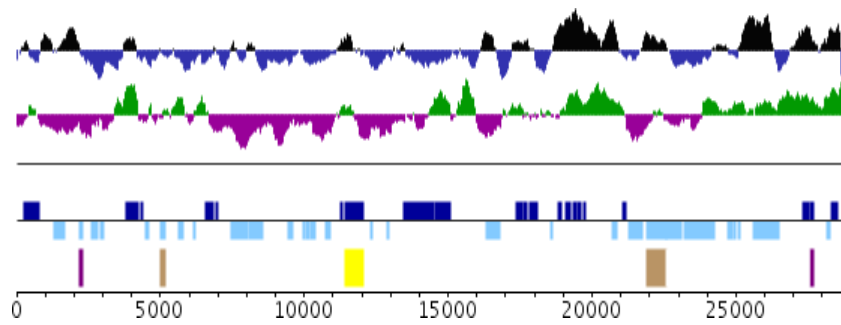

**E - Plasmid Ip28-3 "H" 24282 bp**

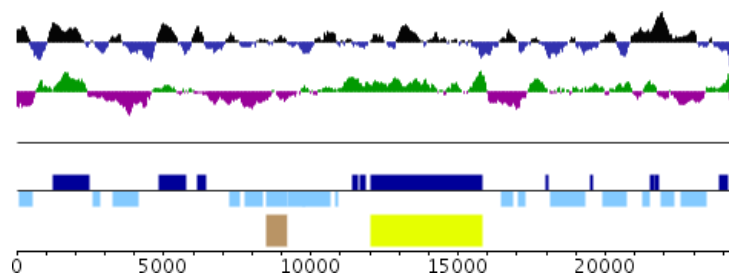

**F - Plasmid Ip28-4 "I" 25184 bp**

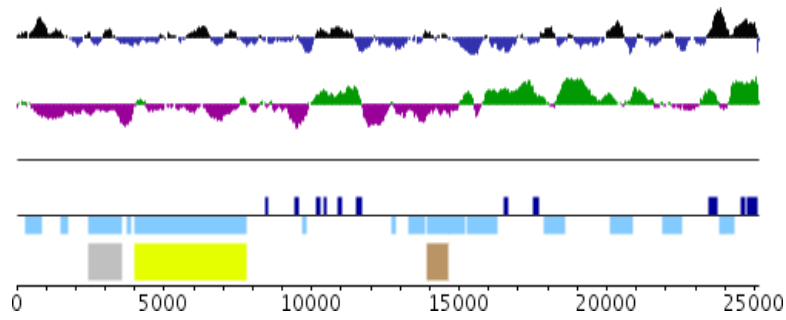

**G - Plasmid Ip28-8 "AC" 28638 bp**

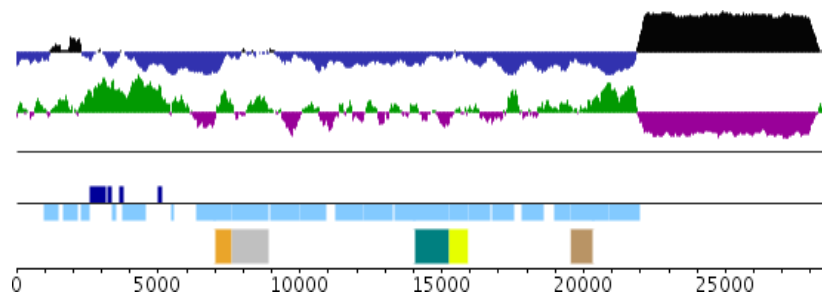

**H - Plasmid Ip38 "J" 36114 bp**

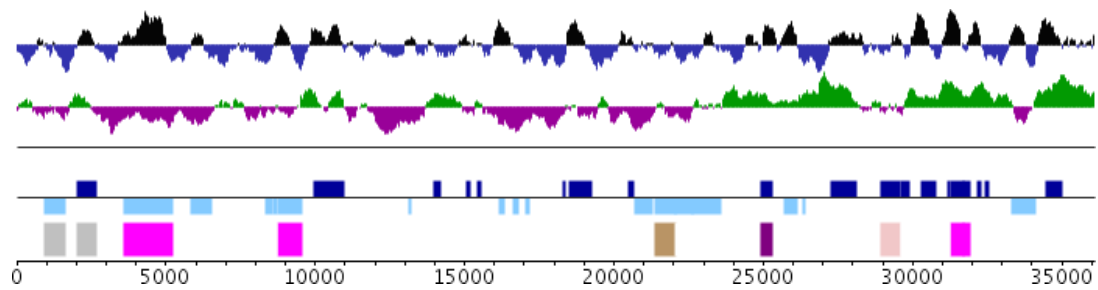

# I - Plasmid Ip54 "A" 57181 bp

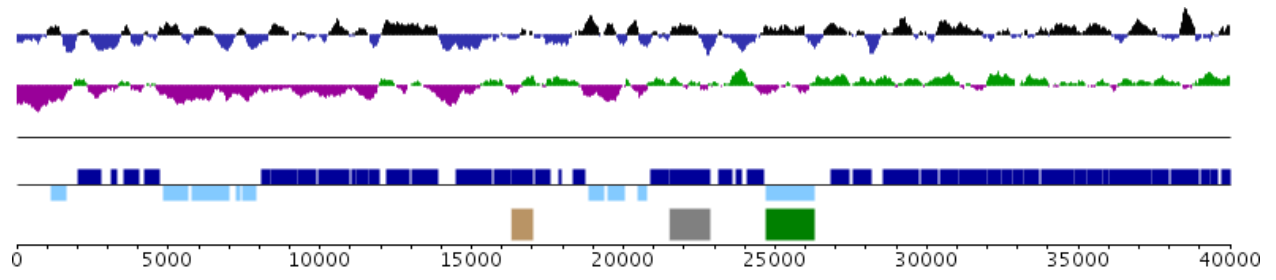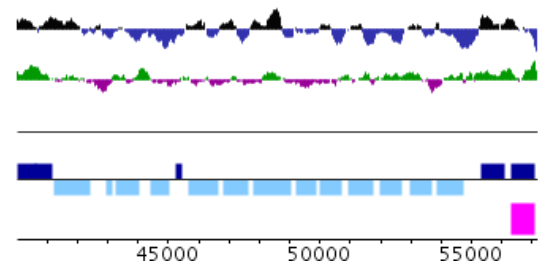

Supplement: pone.0120548.s002.pdf [file pone.0120548.s002.pdf]
